# Supplementary material
Source: publisher figshare collection journal article supplement (https://acs.figshare.com/ndownloader/files/10785239)
Supplement: Supplementary file 1 [file 10785239]

# **Supporting Information**

For

## **Enhanced Selectivity by Passivation: Molecular Imprints for Viruses with Exceptional Binding Properties**

Manuela Gast<sup>1</sup>, Stefanie Kühner<sup>2</sup>, Harald Sobek<sup>2</sup>, Paul Walther<sup>3</sup>, Boris Mizaikoff<sup>1\*</sup>

<sup>1</sup> *Institute of Analytical and Bioanalytical Chemistry, Ulm University, Albert-Einstein-Allee 11, 89081 Ulm, Germany*

<sup>2</sup> *Labor Dr. Merk & Kollegen GmbH, Beim Braunland 1, 88414 Ochsenhausen*

<sup>3</sup> *Zentrale Einrichtung Elektronenmikroskopie, Ulm University, Albert-Einstein-Allee 11, 89081 Ulm, Germany*

### **Corresponding Author**

\* E-mail: [boris.mizaikoff@uni-ulm.de](mailto:boris.mizaikoff@uni-ulm.de)

## ζ-Potential Measurements

The ζ-potential of bare and functionalized (1.5 μmol / mg SP) SPs was measured using Zetasizer Nano from Malvern. Measurements were performed in triplicates.

**Table S-1. ζ-Potential of bare and functionalized SPs.**

| Bare SP          | Amino-Functionalized | Glutaraldehyde-Functionalized |
|------------------|----------------------|-------------------------------|
| -57.17 ± 0.31 mV | 32.97 ± 0.25 mV      | 16.37 ± 0.21 mV               |

## Virus Study via Quantitative PCR

Viral titers were quantified by quantitative polymerase chain reaction (qPCR). To monitor the immobilization of the virus at the functionalized SPs, reaction samples were collected at regular time intervals, and then the remaining amount of virus in the supernatant was quantified via qPCR. Hereby, it was shown (Figure S-1) that after an incubation time of 45 min the remaining target concentration was close to zero and remained constant. Hence, an immobilization time of one hour was determined as appropriate. A more detailed description of this approach is reported elsewhere.<sup>1</sup>

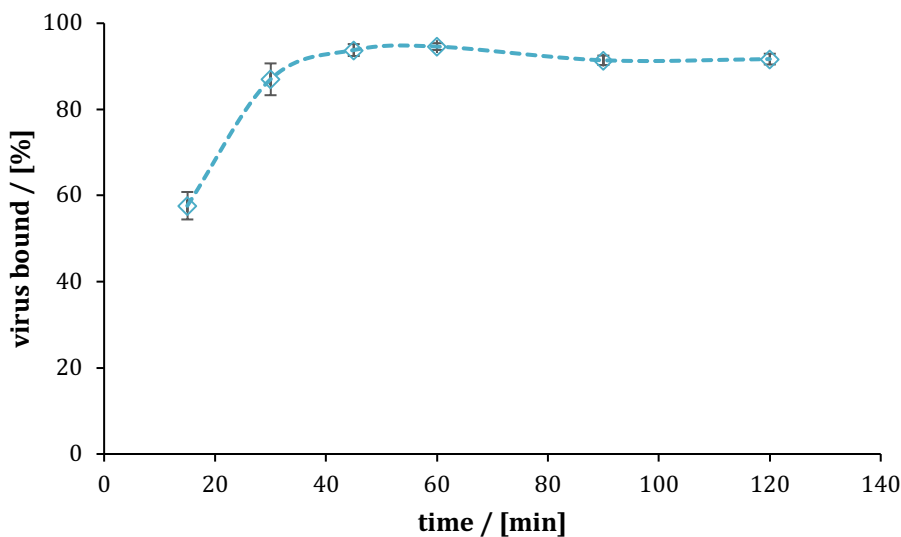

**Figure S-1. Amount AdV bound at functionalized SPs prior to the imprinting.** | Samples were detected using qPCR and the results were normalized as percentage of the initially added adenovirus amount. Experiments were performed in triplicate.

## Determination and Controlling of Polymer Layer Thickness

The second step during the imprinting procedure comprises a thin-layer polymer growth at the surface of the silica particles. To confirm and control the thickness of this layer, focused ion beam (FIB) milled cross-sections of the synthesized particles were imaged via electron microscopy. As Figure S-2 exemplarily shows, the layer-thickness amounts to 20-50 nm.

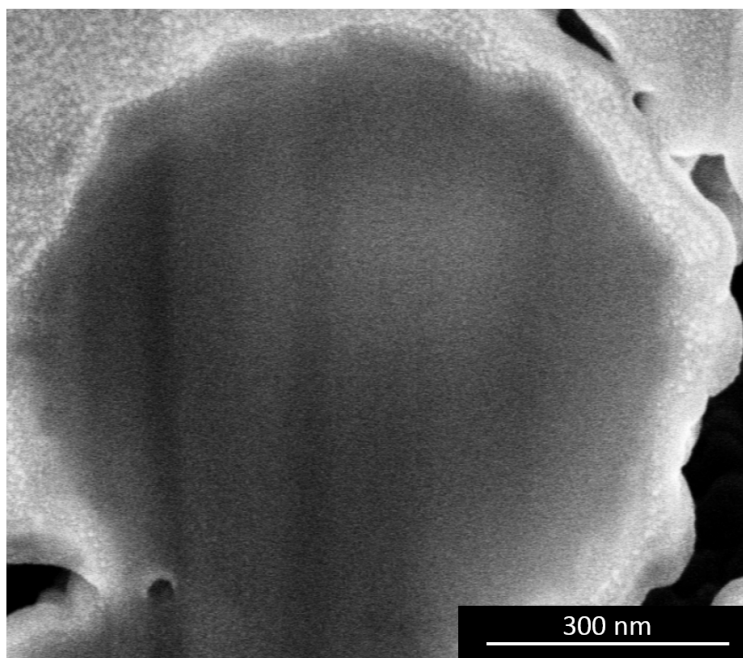

**Figure S-2.** Secondary electron images of the FIB cross-sections from a virus imprinted particle.

## REFERENCES

- (1) Gast, M.; Kühner, S.; Sobek, H.; Mizaikoff, B. *Analyst* **2018**, accepted.
